# Supplementary material for: High Concentration or Combined Treatment of Antisense Oligonucleotides for Spinal Muscular Atrophy Perturbed SMN2 Splicing in Patient Fibroblasts
Source: MDPI journal article supplement (doi:10.3390/genes13040685), 2022-04-13
Supplement: s1 [file s1]

Supplementary Table S1. Dose effects of ASOs on *SMN2* splicing pattern: densitometry data

|                                         |      | dH2O     | ASO-NUS  |          |          | ASO-EX8  |          |          | ASO-SSJ  |          |          |
|-----------------------------------------|------|----------|----------|----------|----------|----------|----------|----------|----------|----------|----------|
|                                         |      |          | 50       | 100      | 200      | 50       | 100      | 200      | 50       | 100      | 200      |
| Ex6/Ex7/In7/Ex8<br>(Intron 7-retention) | Mean | 0.00     | 0.00     | 0.00     | 0.00     | trace    | trace    | 12350.00 | trace    | trace    | trace    |
|                                         | [SD] | 0.00     | 0.00     | 0.00     | 0.00     | -        | -        | 401.43   | -        | -        | -        |
| Ex6/Ex7a/Ex7/Ex8<br>(Ex7a-inclusion)    | Mean | 0.00     | 0.00     | 0.00     | 26335.00 | 0.00     | 0.00     | 20624.00 | 0.00     | 0.00     | 12747.45 |
|                                         | [SD] | 0.00     | 0.00     | 0.00     | 224.17   | 0.00     | 0.00     | 478.21   | 0.00     | 0.00     | 29.17    |
| Ex6/Ex7/Ex8                             | Mean | 10430.50 | 26590.12 | 32882.02 | 32255.23 | 25970.89 | 27130.64 | 14797.72 | 30965.13 | 12709.60 | 10044.55 |
|                                         | [SD] | 260.98   | 7.53     | 98.96    | 60.13    | 42.41    | 30.32    | 132.46   | 101.11   | 30.25    | 53.71    |
| Ex6/Ex8                                 | Mean | 25130.68 | 21051.24 | 4807.86  | 13677.30 | 12789.16 | 19630.76 | 19502.62 | 14792.37 | 26341.05 | 21524.69 |
|                                         | [SD] | 1255.60  | 364.37   | 332.23   | 407.57   | 25.36    | 237.55   | 323.41   | 242.47   | 331.85   | 383.49   |
| GAPDH                                   | Mean | 33722.02 | 31291.89 | 30532.87 | 30161.77 | 31147.08 | 30150.06 | 28300.53 | 32590.50 | 29673.50 | 26159.22 |
|                                         | [SD] | 86.89    | 106.50   | 117.64   | 47.34    | 93.29    | 64.39    | 227.10   | 218.33   | 187.69   | 50.98    |

Supplementary Table S2. Dose effects of ASOs on *SMN2* splicing pattern: densitometry data (*SMN2* transcript level/*GAPDH* level)

|                                         |      | dH2O | ASO-NUS |      |      | ASO-EX8 |       |      | ASO-SSJ |       |       |
|-----------------------------------------|------|------|---------|------|------|---------|-------|------|---------|-------|-------|
|                                         |      |      | 50      | 100  | 200  | 50      | 100   | 200  | 50      | 100   | 200   |
| Ex6/Ex7/In7/Ex8<br>(Intron 7-retention) | Mean | 0.00 | 0.00    | 0.00 | 0.00 | trace   | trace | 0.44 | trace   | trace | trace |
|                                         | [SD] | 0.00 | 0.00    | 0.00 | 0.00 | -       | -     | 0.01 | -       | -     | -     |
| Ex6/Ex7a/Ex7/Ex8<br>(Ex7a-inclusion)    | Mean | 0.00 | 0.00    | 0.00 | 0.87 | 0.00    | 0.00  | 0.73 | 0.00    | 0.00  | 0.49  |
|                                         | [SD] | 0.00 | 0.00    | 0.00 | 0.01 | 0.00    | 0.00  | 0.01 | 0.00    | 0.00  | 0.00  |
| Ex6/Ex7/Ex8                             | Mean | 0.31 | 0.85    | 1.08 | 1.07 | 0.83    | 0.90  | 0.52 | 0.95    | 0.43  | 0.38  |
|                                         | [SD] | 0.01 | 0.00    | 0.01 | 0.00 | 0.00    | 0.00  | 0.01 | 0.01    | 0.00  | 0.00  |
| Ex6/Ex8                                 | Mean | 0.75 | 0.67    | 0.16 | 0.45 | 0.41    | 0.65  | 0.69 | 0.45    | 0.89  | 0.82  |
|                                         | [SD] | 0.04 | 0.01    | 0.01 | 0.01 | 0.00    | 0.01  | 0.01 | 0.00    | 0.01  | 0.01  |

Supplementary Table S3. Dose effects of ASOs on *SMN2* splicing pattern: Full-length/delta-7 ratio

|                             |      | dH2O | ASO-NUS |      |      | ASO-EX8 |      |      | ASO-SSJ |      |      |
|-----------------------------|------|------|---------|------|------|---------|------|------|---------|------|------|
|                             |      |      | 50      | 100  | 200  | 50      | 100  | 200  | 50      | 100  | 200  |
| Full-length / delta-7 ratio | Mean | 0.42 | 1.26    | 6.87 | 2.36 | 2.03    | 1.38 | 0.76 | 2.09    | 0.48 | 0.47 |
|                             | [SD] | 0.02 | 0.02    | 0.44 | 0.07 | 0.00    | 0.02 | 0.02 | 0.04    | 0.01 | 0.01 |

Supplementary Table S4. Combination effects of ASOs on *SMN2* splicing pattern: densitometry data

|                                         |      | dH2O     | ASO-NUS  | ASO-EX8  | ASO-SSJ  | ASO-NUS /<br>ASO-EX8 | ASO-NUS /<br>ASO-SSJ | ASO-EX8 /<br>ASO-SSJ |
|-----------------------------------------|------|----------|----------|----------|----------|----------------------|----------------------|----------------------|
| Ex6/Ex7/In7/Ex8<br>(Intron 7-retention) | Mean | 0.00     | 0.00     | trace    | trace    | trace                | trace                | 39694.21             |
|                                         | [SD] | 0.00     | 0.00     | -        | -        | -                    | -                    | 239.13               |
| Ex6/Ex7a/Ex7/Ex8<br>(Ex7a-inclusion)    | Mean | 0.00     | 0.00     | 0.00     | 0.00     | 17184.59             | 25994.98             | trace                |
|                                         | [SD] | 0.00     | 0.00     | 0.00     | 0.00     | 257.07               | 190.06               | -                    |
| Ex6/Ex7/Ex8                             | Mean | 25818.63 | 47905.91 | 30041.50 | 28886.11 | 35663.21             | 30998.04             | 13182.53             |
|                                         | [SD] | 68.02    | 119.64   | 214.47   | 279.53   | 56.58                | 24.50                | 96.63                |
| Ex6/Ex8                                 | Mean | 30385.77 | 1781.11  | 9917.55  | 8538.18  | 4658.79              | 6486.39              | 14161.24             |
|                                         | [SD] | 153.49   | 101.65   | 187.12   | 454.66   | 164.04               | 109.694616           | 313.46               |
| GAPDH                                   | Mean | 48984.24 | 43108.71 | 37577.08 | 45054.82 | 39015.97             | 37986.74             | 35996.07             |
|                                         | [SD] | 316.53   | 111.34   | 130.38   | 126.37   | 259.85               | 234.96               | 136.35               |

Supplementary Table S5. Combination effects of ASOs on *SMN2* splicing pattern: densitometry data (adjusted to GAPDH level)

|                                         |      | dH2O | ASO-NUS | ASO-EX8 | ASO-SSJ | ASO-NUS /<br>ASO-EX8 | ASO-NUS /<br>ASO-SSJ | ASO-EX8 /<br>ASO-SSJ |
|-----------------------------------------|------|------|---------|---------|---------|----------------------|----------------------|----------------------|
| Ex6/Ex7/In7/Ex8<br>(Intron 7-retention) | Mean | 0.00 | 0.00    | trace   | trace   | trace                | trace                | 1.10                 |
|                                         | [SD] | 0.00 | 0.00    | -       | -       | -                    | -                    | 0.01                 |
| Ex6/Ex7a/Ex7/Ex8<br>(Ex7a-inclusion)    | Mean | 0.00 | 0.00    | 0.00    | 0.00    | 0.44                 | 0.68                 | trace                |
|                                         | [SD] | 0.00 | 0.00    | 0.00    | 0.00    | 0.01                 | 0.01                 | -                    |
| Ex6/Ex7/Ex8                             | Mean | 0.53 | 1.11    | 0.80    | 0.64    | 0.91                 | 0.82                 | 0.37                 |
|                                         | [SD] | 0.00 | 0.01    | 0.00    | 0.01    | 0.01                 | 0.00                 | 0.00                 |
| Ex6/Ex8                                 | Mean | 0.62 | 0.04    | 0.26    | 0.19    | 0.12                 | 0.17                 | 0.39                 |
|                                         | [SD] | 0.01 | 0.00    | 0.01    | 0.01    | 0.00                 | 0.00                 | 0.01                 |

Supplementary Table S6. Combination effects of ASOs on *SMN2* splicing pattern: Full-length/delta-7 ratio

|                             |      | dH2O | ASO-NUS | ASO-EX8 | ASO-SSJ | ASO-NUS /<br>ASO-EX8 | ASO-NUS /<br>ASO-SSJ | ASO-EX8 /<br>ASO-SSJ |
|-----------------------------|------|------|---------|---------|---------|----------------------|----------------------|----------------------|
| Full-length / delta-7 ratio | Mean | 0.23 | 7.29    | 0.82    | 0.92    | 2.07                 | 1.29                 | 0.25                 |
|                             | [SD] | 0.00 | 0.42    | 0.02    | 0.06    | 0.07                 | 0.02                 | 0.01                 |
